# Supplementary material
Source: PubMed Central journal article supplement (PMC5084981)
Supplement: ry152149suppa1.pdf [file ry152149suppa1.pdf]

**Table E1. Representative Major Findings from Imaging Studies with Different Techniques in Psychiatric Disorders**

| Psychiatric Disorder and Study | No. of Subjects* | Imaging Technique | Main Findings in Patients                                                                                                                                                                                                                            |
|--------------------------------|------------------|-------------------|------------------------------------------------------------------------------------------------------------------------------------------------------------------------------------------------------------------------------------------------------|
| <b>MDD</b>                     |                  |                   |                                                                                                                                                                                                                                                      |
| Schmaal et al (12)             | 1728:7199        | sMRI              | Decreased hippocampal volume                                                                                                                                                                                                                         |
| van Eijndhoven et al (117)     | 40:31            | sMRI              | Decreased cortical thickness in the medial orbitofrontal cortex; increased cortical thickness in the temporal pole and the caudal anterior and posterior cingulate cortex                                                                            |
| Salvadore et al (15)           | 85:107           | sMRI              | Decreased gray matter in the dorsal anterolateral, dorsomedial, and ventrolateral prefrontal cortex                                                                                                                                                  |
| Papmeyer et al (118)           | 111:93           | sMRI              | Decreased cortical thickness in the right parahippocampal and fusiform gyrus                                                                                                                                                                         |
| Samann et al (119)             | 167:92           | sMRI              | Increased left hippocampal and bilateral posterior cingulate gray matter volumes; decreased right lateral temporal gray matter volume                                                                                                                |
| Yucel et al (120)              | 65:93            | sMRI              | Decreased subgenual prefrontal cortex volumes.                                                                                                                                                                                                       |
| Serra-Blasco et al (121)       | 66:32            | sMRI              | Decreased gray matter volume in right superior frontal gyrus, left cingulate gyrus, bilateral medial frontal gyrus, left insula, left inferior frontal gyrus, left parahippocampal gyrus, left transverse temporal gyrus, and left postcentral gyrus |
| Tae et al (122)                | 21:21            | sMRI              | Decreased hippocampal volume                                                                                                                                                                                                                         |
| Soriano-Mas et al (123)        | 70:40            | sMRI              | Decreased gray matter in the bilateral insula                                                                                                                                                                                                        |
| Ahdidan et al (124)            | 24:33            | sMRI              | Decreased gray matter in the temporal lobes bilaterally, the medulla, and the right hippocampus                                                                                                                                                      |
| Swartz et al (125)             | 157:0            | fMRI              | Increased amygdala reactivity during adolescence, prior to the development of depression, as a function of familial risk or, in the absence of familial risk, stressful life events                                                                  |
| Langenecker et al (126)        | 20:22            | fMRI              | Increased activation in frontal, limbic, and temporal regions during correct rejection of lures                                                                                                                                                      |
| Siegle et al (24)              | 14:21            | fMRI              | Decreased sustained reactivity in the subgenual cingulate cortex; increased sustained reactivity in the amygdala                                                                                                                                     |
| Tao et al (127)                | 19:21            | fMRI              | Decreased activation in the amygdala, orbitofrontal cortex, and subgenual anterior cingulate cortex bilaterally                                                                                                                                      |
| Arnone et al (128)             | 62:54            | fMRI              | Increased amygdala activation in response to sad facial emotions                                                                                                                                                                                     |
| Walsh et al (129)              | 20:20            | fMRI              | Decreased linear load-response in the dorsal anterior cingulate, left middle frontal, and lateral temporal cortices                                                                                                                                  |
| Fu et al (130)                 | 19:19            | fMRI              | Decreased activation in the left amygdala, ventral striatum, and frontoparietal cortex                                                                                                                                                               |

|                       |                                                |            |                                                                                                                                                                                                                                                                                                                                                                                                                                                                                                                                  |
|-----------------------|------------------------------------------------|------------|----------------------------------------------------------------------------------------------------------------------------------------------------------------------------------------------------------------------------------------------------------------------------------------------------------------------------------------------------------------------------------------------------------------------------------------------------------------------------------------------------------------------------------|
| Liu et al (30)        | 30:30                                          | fMRI       | Increased ALFF in the frontal cortex (including the bilateral ventral or dorsal anterior cingulate cortex, orbitofrontal cortex, premotor cortex, ventral prefrontal cortex, left dorsal lateral frontal cortex, and left superior frontal cortex), basal ganglia (including the right putamen and left caudate nucleus), left insular cortex, right anterior entorhinal cortex, and left inferior parietal cortex; decreased ALFF in the bilateral occipital cortex, cerebellum hemisphere, and right superior temporal cortex. |
| Jia et al (17)        | 52:52                                          | DTI        | Decreased fractional anisotropy in the left anterior limb of the internal capsule and in the right frontal lobe                                                                                                                                                                                                                                                                                                                                                                                                                  |
| Ma et al (16)         | 14:14                                          | DTI        | Decreased fractional anisotropy in the white matter of the right middle frontal gyrus, left lateral occipitotemporal gyrus, and subgyral and angular gyri of the right parietal lobe.                                                                                                                                                                                                                                                                                                                                            |
| Schizophrenia         |                                                |            |                                                                                                                                                                                                                                                                                                                                                                                                                                                                                                                                  |
| Zhang et al (33)      | 25:33                                          | sMRI       | Decreased cortical thickness in the bilateral ventromedial prefrontal cortices, left superior temporal gyrus, and right pars triangularis; increased cortical thickness in the left superior parietal lobe                                                                                                                                                                                                                                                                                                                       |
| Xiao et al (22)       | 128:128                                        | sMRI       | Decreased cortical thickness, primarily in the bilateral prefrontal and parietal cortex; increased thickness in the bilateral anterior temporal lobes, left medial orbitofrontal cortex, and left cuneus.                                                                                                                                                                                                                                                                                                                        |
| Yao et al (131)       | 64:64                                          | sMRI       | Decreased white matter volume in the bilateral posterior limb of the internal capsule and right subgyral frontal white matter                                                                                                                                                                                                                                                                                                                                                                                                    |
| Andreasen et al (132) | 202:0                                          | sMRI       | Greater relapse duration is significantly associated with tissue loss in total cerebral volume and in the frontal lobe                                                                                                                                                                                                                                                                                                                                                                                                           |
| Bodnar et al (53)     | 59:0 (42 nonremitted and 17 remitted patients) | sMRI       | Decreased parahippocampal gray matter bilaterally in nonremitted patients                                                                                                                                                                                                                                                                                                                                                                                                                                                        |
| Ho et al (51)         | 211:0                                          | sMRI       | Longer follow-up correlated with smaller brain tissue volumes and larger cerebrospinal fluid volumes; more antipsychotic treatment was associated with smaller gray matter volumes.                                                                                                                                                                                                                                                                                                                                              |
| Ren et al (31)        | 100:100                                        | sMRI, fMRI | Decreased gray matter volume in the left paracentral and left inferior parietal lobules; increased gray matter volume in the left and right thalamus, anterior cingulate cortex, insula, and orbital frontal gyrus; decreased ALFF in the right inferior and left superior frontal gyrus, the medial frontal gyrus bilaterally, the inferior parietal lobule bilaterally, and the precuneus; increased ALFF in the putamen and occipital regions bilaterally                                                                     |
| Lui et al (8)         | 68:68                                          | sMRI, fMRI | Decreased gray matter volume in the right superior temporal gyrus, right middle temporal gyrus, and right anterior cingulate gyrus; no significant differences in the resting state functional connectivity of any of the three seed areas.                                                                                                                                                                                                                                                                                      |
| Lui et al (114)       | 34:34                                          | fMRI       | Decreased ALFF in the bilateral ventromedial frontal cortex at baseline; increased ALFF in the right caudate and left putamen after treatment                                                                                                                                                                                                                                                                                                                                                                                    |
| Huang et al (133)     | 66:66                                          | fMRI       | Decreased ALFF in the medial prefrontal lobe; increased ALFF in the left and right putamen                                                                                                                                                                                                                                                                                                                                                                                                                                       |
| Wheeler et al (134)   | 128:130                                        | fMRI       | Increased frontoparietal and frontotemporal coupling                                                                                                                                                                                                                                                                                                                                                                                                                                                                             |

|                          |         |           |                                                                                                                                                                                                                                                                                                                                                                                                        |
|--------------------------|---------|-----------|--------------------------------------------------------------------------------------------------------------------------------------------------------------------------------------------------------------------------------------------------------------------------------------------------------------------------------------------------------------------------------------------------------|
| Ma et al (135)           | 28:28   | fMRI      | Decreased small-worldness during both task and rest; the altered task-induced modulations to topologic measures of motor, cerebellum, and parietal regions                                                                                                                                                                                                                                             |
| Voineskos et al (136)    | 77:79   | sMRI, DTI | Disruption of white matter tracts at the right inferior longitudinal fasciculus, the right arcuate fasciculus, and the left uncinate fasciculus; decreased cortical thickness in bilateral left orbitofrontal cortex, the middle temporal gyrus, the temporal pole, the dorsolateral prefrontal cortex, the parietal operculum, the parahippocampal gyrus, the superior temporal gyrus, and the insula |
| Sun et al (108)          | 113:110 | DTI       | Two distinct patterns of white matter abnormalities exist at the early phase in different subtypes of schizophrenia                                                                                                                                                                                                                                                                                    |
| Szeszko et al (34)       | 10:13   | DTI       | Decreased fractional anisotropy in the left internal capsule and left hemisphere white matter of the middle frontal gyrus and posterior superior temporal gyrus                                                                                                                                                                                                                                        |
| Mandl et al (35)         | 16:23   | DTI       | Decreased fractional anisotropy, mean diffusivity, and magnetization transfer ratio in the right uncinate fasciculus and left arcuate fasciculus                                                                                                                                                                                                                                                       |
| BD                       |         |           |                                                                                                                                                                                                                                                                                                                                                                                                        |
| Najt et al (137)         | 35:37   | sMRI      | Increased volume contraction over time in a region, including the insula and orbitofrontal, rostral, and dorsolateral prefrontal cortices.                                                                                                                                                                                                                                                             |
| van Erp et al (138)      | 32:32   | sMRI      | Increased global hippocampal volume                                                                                                                                                                                                                                                                                                                                                                    |
| Foland-Ross et al (139)  | 34:31   | sMRI      | Decreased gray matter in bilateral prefrontal cortex and left anterior cingulate cortex; additionally, thinning in these regions was more pronounced in patients with a history of psychosis.                                                                                                                                                                                                          |
| van der Schot et al (73) | 234:134 | sMRI      | BD was associated with a decrease in total cortical volume                                                                                                                                                                                                                                                                                                                                             |
| Rimol et al (140)        | 139:207 | sMRI      | No cortical thinning in patients with BD as compared with that in control subjects; decreased cortical thickness primarily in the frontal lobes and superior temporal and temporoparietal regions                                                                                                                                                                                                      |
| Savitz et al (141)       | 35:35   | sMRI      | Decreased bilateral amygdala volumes in unmedicated patients; there was a trend toward greater amygdala volumes in medicated patients.                                                                                                                                                                                                                                                                 |
| Nugent et al (57)        | 36:65   | sMRI      | Decreased gray matter in the posterior cingulate or retrosplenial cortex and superior temporal gyrus in unmedicated patients subjects relative to that in medicated subjects; decreased gray matter in the lateral orbital cortex in medicated subjects; increased white matter in the orbital and posterior cingulate cortices                                                                        |
| Magioncalda et al (70)   | 40:40   | fMRI      | Decreased functional connectivity between perigenual anterior cingulate cortex and posterior default mode network and in the salience network.                                                                                                                                                                                                                                                         |
| Gruber et al (142)       | 18:18   | fMRI      | Only the patients exhibited activation of the right amygdala during the articulatory rehearsal task; there was increased functional activation in the right frontal and intraparietal cortex and in the right cerebellum                                                                                                                                                                               |

|                         |         |           |                                                                                                                                                                                                                                                                                             |
|-------------------------|---------|-----------|---------------------------------------------------------------------------------------------------------------------------------------------------------------------------------------------------------------------------------------------------------------------------------------------|
| Vizueta et al (143)     | 21:21   | fMRI      | Decreased activation in the left and right ventrolateral prefrontal cortices and right amygdala; decreased negative functional connectivity between the right amygdala and the right orbitofrontal cortex, as well as the right dorsolateral prefrontal cortex                              |
| Versace et al (144)     | 31:24   | fMRI      | Abnormally elevated left amygdala-orbitofrontal cortical functional connectivity to sad stimuli, together with abnormally reduced amygdala-orbitofrontal cortical functional connectivity to intense happy stimuli might represent a state marker of depression in patients with BD         |
| Mechelli et al (145)    | 29:45   | fMRI      | The right posterior orbital gyrus expressed increased activation in individuals with the high-risk variant, but only in patients with BD                                                                                                                                                    |
| Wang et al (66)         | 33:31   | fMRI, DTI | Decreased functional connectivity between the perigenual anterior cingulate cortex and amygdala; there was a significant positive association between perigenual anterior cingulate cortex and amygdala functional coupling and fractional anisotropy in ventrofrontal white matter         |
| Leow et al (146)        | 25:24   | DTI       | Increased characteristic path length, lower clustering coefficient, and lower global efficiency; impaired interhemispheric but relatively preserved intrahemispheric integration                                                                                                            |
| Versace et al (147)     | 31:25   | DTI       | Increased fractional anisotropy in the left orbitomedial prefrontal cortex<br>Decreased fractional anisotropy in the right orbitomedial prefrontal cortex.                                                                                                                                  |
| McIntosh et al (148)    | 45:49   | DTI       | Decreased fractional anisotropy in the uncinate fasciculus and anterior thalamic radiation.                                                                                                                                                                                                 |
| Adler et al (62)        | 11:17   | DTI       | Decreased fractional anisotropy only in superior-frontal white matter tracts                                                                                                                                                                                                                |
| ADHD                    |         |           |                                                                                                                                                                                                                                                                                             |
| Hoekzema et al (74)     | 18:0    | sMRI      | Increased gray matter in bilateral middle frontal cortex and right inferior-posterior cerebellum after cognitive training                                                                                                                                                                   |
| He et al (75)           | 37:35   | sMRI      | Decreased gray matter volumes were identified in the right orbitofrontal cortex, right primary motor and premotor cortex, left anterior cingulate cortex, and left posterior midcingulate cortex                                                                                            |
| Hoekzema et al (149)    | 19:0    | fMRI      | Increased activity in the cerebellum, which correlated with improvement on in-imager measures of attention.                                                                                                                                                                                 |
| Morein-Zamir et al (78) | 19:19   | fMRI      | Hypoactivation in right inferior frontal cortex is specifically associated with motor response inhibition                                                                                                                                                                                   |
| Kucyi et al (79)        | 23:23   | fMRI      | Cerebellar areas of the default mode network positive functional connectivity with widespread regions of salience, dorsal attention, and sensorimotor networks<br>Increased functional connectivity of cerebellar default mode network areas with frontoparietal and visual network regions |
| Sripada et al (150)     | 275:481 | fMRI      | Default network ventral attention network interconnections are a key locus of dysfunction in patients with ADHD; distributed dysconnectivity within and between large-scale networks is present in patients with ADHD                                                                       |
| Lei et al (151)         | 28:28   | DTI       | Abnormalities in the temporo-occipital areas, while the combined subtype is related to abnormalities in the frontal-subcortical circuit, frontolimbic pathway, and temporo-occipital areas                                                                                                  |
| Silk et al (77)         | 15:15   | DTI       | Increased fractional anisotropy in regions underlying inferior parietal, occipitoparietal, inferior frontal, and inferior temporal cortex.                                                                                                                                                  |

|                                 |       |            |                                                                                                                                                                                                                                                                                                         |
|---------------------------------|-------|------------|---------------------------------------------------------------------------------------------------------------------------------------------------------------------------------------------------------------------------------------------------------------------------------------------------------|
| de Zeeuw et al (76)             | 30:34 | DTI        | There were no differences in fractional anisotropy or magnetization transfer ratio in total cerebral white matter                                                                                                                                                                                       |
| <b>PTSD</b>                     |       |            |                                                                                                                                                                                                                                                                                                         |
| Chao et al (85)                 | 55:0  | sMRI       | Duration was significantly associated with right hippocampal volume                                                                                                                                                                                                                                     |
| Gezue et al (152)               | 25:25 | sMRI       | Decreased cortical thickness in bilateral superior and middle frontal gyri, left inferior frontal gyrus, and left superior temporal gyrus.                                                                                                                                                              |
| Kasai et al (153)               | 18:23 | sMRI       | Decreased gray matter density in right hippocampus, pregenual anterior cingulate cortex, and left and right insula                                                                                                                                                                                      |
| Woodward et al (154)            | 38:25 | sMRI       | Decreased anterior cingulate cortex volume                                                                                                                                                                                                                                                              |
| Corbo et al (155)               | 14:14 | sMRI       | Decreased gray matter density in the right pregenual anterior cingulate cortex and in the left insula                                                                                                                                                                                                   |
| Wignall et al (84)              | 15:11 | sMRI       | Decreased right hippocampal volume                                                                                                                                                                                                                                                                      |
| De Bellis et al (88)            | 28:66 | sMRI       | Decreased intracranial, cerebral, and prefrontal cortex; prefrontal cortical white matter; and right temporal lobe volumes and areas of the corpus callosum; increased frontal lobe cerebrospinal fluid volumes                                                                                         |
| Suo et al (156)                 | 28:26 | fMRI       | Increase in the clustering coefficient and a normalized characteristic path length and local efficiency, suggesting a shift toward regular networks                                                                                                                                                     |
| Gong et al (95)                 | 65:56 | fMRI       | Use of relevance vector regression can enable prediction of the clinical scores of PTSD, particularly in frontal and parietal areas bilaterally, as well as in the cingulate, cerebellar, and subcortical regions                                                                                       |
| Shang et al (98)                | 18:20 | fMRI       | Patients with PTSD have functional alterations in the somatomotor network, auditory network, and visual network                                                                                                                                                                                         |
| Lui et al (99)                  | 44:32 | fMRI       | Increased regional activity in frontolimbic and striatal areas; decreased connectivity among limbic and striatal networks in patients who had recently experienced severe emotional trauma.                                                                                                             |
| Shin et al (101)                | 12:12 | fMRI       | Increased responsivity in the dorsal anterior cingulate appears to be a familial risk factor for the development of PTSD after psychologic trauma                                                                                                                                                       |
| Lanius et al (91)               | 9:9   | fMRI       | Decreased activation of the thalamus, anterior cingulate gyrus, and medial frontal gyrus                                                                                                                                                                                                                |
| Lei et al (90)                  | 27:24 | DTI        | Pediatric PTSD is accompanied by a connectivity disequilibrium between the salience and default-mode networks                                                                                                                                                                                           |
| <b>Autism spectrum disorder</b> |       |            |                                                                                                                                                                                                                                                                                                         |
| Hadjikhani et al (157)          | 10:7  | sMRI, fMRI | Decreased activation in the right amygdala, inferior frontal cortex, superior temporal sulcus, and face-related somatosensory and premotor cortex; the severity of social symptoms was correlated with the right inferior frontal cortex cortical thickness and with functional activation in that area |
| Murdaugh et al (158)            | 31:22 | fMRI       | Increased connectivity between the Broca area and the right superior temporal gyrus, as well as the Wernicke area and left inferior frontal gyrus                                                                                                                                                       |
| Lai et al (159)                 | 12:15 | fMRI       | Decreased activation within the superior temporal gyrus during passive speech stimulation                                                                                                                                                                                                               |
| Lombardo et al (160)            | 33:33 | fMRI       | Decreased functional connectivity between ventromedial prefrontal cortex and areas associated with lower level embodied representations                                                                                                                                                                 |

|                   |       |      |                                                                                                                                                                                   |
|-------------------|-------|------|-----------------------------------------------------------------------------------------------------------------------------------------------------------------------------------|
| Luna et al (161)  | 11:6  | fMRI | Decreased task-related activation in dorsolateral prefrontal cortex and posterior cingulate cortex during a spatial working memory task                                           |
| Verly et al (162) | 17:25 | DTI  | Absence of the right hemispheric arcuate fascicle, which extends from the inferior frontal gyrus to the temporal region, and was related to lower language performance and scores |

Note.—ADHD = attention deficit hyperactivity disorder, BD = bipolar disorder ALFF = amplitude of low-frequency fluctuation, DTI = diffusion tensor imaging, fMRI = functional magnetic resonance (MR) imaging, MDD = major depressive disorder, PTSD = posttraumatic stress disorder, sMRI = structural MR imaging.

\* Data are ratio of patients to control subjects.

## References

117. van Eijndhoven P, van Wingen G, Katzenbauer M, et al. Paralimbic cortical thickness in first-episode depression: evidence for trait-related differences in mood regulation. *Am J Psychiatry* 2013;170(12):1477–1486.

118. Pappmeyer M, Giles S, Sussmann JE, et al. Cortical thickness in individuals at high familial risk of mood disorders as they develop major depressive disorder. *Biol Psychiatry* 2015;78(1):58–66.

119. Sämann PG, Höhn D, Chechko N, et al. Prediction of antidepressant treatment response from gray matter volume across diagnostic categories. *Eur Neuropsychopharmacol* 2013;23(11):1503–1515.

120. Yucel K, McKinnon MC, Chahal R, et al. Anterior cingulate volumes in never-treated patients with major depressive disorder. *Neuropsychopharmacology* 2008;33(13):3157–3163.

121. Serra-Blasco M, Portella MJ, Gómez-Ansón B, et al. Effects of illness duration and treatment resistance on grey matter abnormalities in major depression. *Br J Psychiatry* 2013;202:434–440.

122. Tae WS, Kim SS, Lee KU, Nam EC, Choi JW, Park JI. Hippocampal shape deformation in female patients with unremitting major depressive disorder. *AJNR Am J Neuroradiol* 2011;32(4):671–676.
123. Soriano-Mas C, Hernández-Ribas R, Pujol J, et al. Cross-sectional and longitudinal assessment of structural brain alterations in melancholic depression. *Biol Psychiatry* 2011;69(4):318–325.
124. Ahdidan J, Hviid LB, Chakravarty MM, et al. Longitudinal MR study of brain structure and hippocampus volume in major depressive disorder. *Acta Psychiatr Scand* 2011;123(3):211–219.
125. Swartz JR, Williamson DE, Hariri AR. Developmental change in amygdala reactivity during adolescence: effects of family history of depression and stressful life events. *Am J Psychiatry* 2015;172(3):276–283.
126. Langenecker SA, Kennedy SE, Guidotti LM, et al. Frontal and limbic activation during inhibitory control predicts treatment response in major depressive disorder. *Biol Psychiatry* 2007;62(11):1272–1280.
127. Tao R, Calley CS, Hart J, et al. Brain activity in adolescent major depressive disorder before and after fluoxetine treatment. *Am J Psychiatry* 2012;169(4):381–388.
128. Arnone D, McKie S, Elliott R, et al. Increased amygdala responses to sad but not fearful faces in major depression: relation to mood state and pharmacological treatment. *Am J Psychiatry* 2012;169(8):841–850.
129. Walsh ND, Williams SC, Brammer MJ, et al. A longitudinal functional magnetic resonance imaging study of verbal working memory in depression after antidepressant therapy. *Biol Psychiatry* 2007;62(11):1236–1243.

130. Fu CH, Williams SC, Cleare AJ, et al. Attenuation of the neural response to sad faces in major depression by antidepressant treatment: a prospective, event-related functional magnetic resonance imaging study. *Arch Gen Psychiatry* 2004;61(9):877–889.
131. Yao L, Lui S, Deng W, et al. Association of white matter deficits with clinical symptoms in antipsychotic-naive first-episode schizophrenia: an optimized VBM study using 3T. *MAGMA* 2014;27(4):283–290.
132. Andreasen NC, Liu D, Ziebell S, Vora A, Ho BC. Relapse duration, treatment intensity, and brain tissue loss in schizophrenia: a prospective longitudinal MRI study. *Am J Psychiatry* 2013;170(6):609–615.
133. Huang XQ, Lui S, Deng W, et al. Localization of cerebral functional deficits in treatment-naive, first-episode schizophrenia using resting-state fMRI. *Neuroimage* 2010;49(4):2901–2906.
134. Wheeler AL, Wessa M, Szeszko PR, et al. Further neuroimaging evidence for the deficit subtype of schizophrenia: a cortical connectomics analysis. *JAMA Psychiatry* 2015;72(5):446–455.
135. Ma S, Calhoun VD, Eichele T, Du W, Adali T. Modulations of functional connectivity in the healthy and schizophrenia groups during task and rest. *Neuroimage* 2012;62(3):1694–1704.
136. Voineskos AN, Foussias G, Lerch J, et al. Neuroimaging evidence for the deficit subtype of schizophrenia. *JAMA Psychiatry* 2013;70(5):472–480.
137. Najt P, Wang F, Spencer L, et al. Anterior cortical development during adolescence in bipolar disorder. *Biol Psychiatry* 2016;79(4):303–310.



138. van Erp TG, Thompson PM, Kieseppä T, et al. Hippocampal morphology in lithium and non-lithium-treated bipolar I disorder patients, non-bipolar co-twins, and control twins. *Hum Brain Mapp* 2012;33(3):501–510.
139. Foland-Ross LC, Thompson PM, Sugar CA, et al. Investigation of cortical thickness abnormalities in lithium-free adults with bipolar I disorder using cortical pattern matching. *Am J Psychiatry* 2011;168(5):530–539.
140. Rimol LM, Hartberg CB, Nesvåg R, et al. Cortical thickness and subcortical volumes in schizophrenia and bipolar disorder. *Biol Psychiatry* 2010;68(1):41–50.
141. Savitz J, Nugent AC, Bogers W, et al. Amygdala volume in depressed patients with bipolar disorder assessed using high resolution 3T MRI: the impact of medication. *Neuroimage* 2010;49(4):2966–2976.
142. Gruber O, Tost H, Henseler I, et al. Pathological amygdala activation during working memory performance: Evidence for a pathophysiological trait marker in bipolar affective disorder. *Hum Brain Mapp* 2010;31(1):115–125.
143. Vizueta N, Rudie JD, Townsend JD, et al. Regional fMRI hypoactivation and altered functional connectivity during emotion processing in nonmedicated depressed patients with bipolar II disorder. *Am J Psychiatry* 2012;169(8):831–840.
144. Versace A, Thompson WK, Zhou D, et al. Abnormal left and right amygdala-orbitofrontal cortical functional connectivity to emotional faces: state versus trait vulnerability markers of depression in bipolar disorder. *Biol Psychiatry* 2010;67(5):422–431.
145. Mechelli A, Prata DP, Fu CH, et al. The effects of neuregulin1 on brain function in controls and patients with schizophrenia and bipolar disorder. *Neuroimage* 2008;42(2):817–826.

146. Leow A, Ajilore O, Zhan L, et al. Impaired inter-hemispheric integration in bipolar disorder revealed with brain network analyses. *Biol Psychiatry* 2013;73(2):183–193.

147. Versace A, Almeida JR, Hassel S, et al. Elevated left and reduced right orbitomedial prefrontal fractional anisotropy in adults with bipolar disorder revealed by tract-based spatial statistics. *Arch Gen Psychiatry* 2008;65(9):1041–1052.

148. McIntosh AM, Muñoz Maniega S, Lymer GK, et al. White matter tractography in bipolar disorder and schizophrenia. *Biol Psychiatry* 2008;64(12):1088–1092.

149. Hoekzema E, Carmona S, Tremols V, et al. Enhanced neural activity in frontal and cerebellar circuits after cognitive training in children with attention-deficit/hyperactivity disorder. *Hum Brain Mapp* 2010;31(12):1942–1950.

150. Sripada CS, Kessler D, Angstadt M. Lag in maturation of the brain's intrinsic functional architecture in attention-deficit/hyperactivity disorder. *Proc Natl Acad Sci U S A* 2014;111(39):14259–14264.

151. Lei D, Ma J, Du X, Shen G, Jin X, Gong Q. Microstructural abnormalities in the combined and inattentive subtypes of attention deficit hyperactivity disorder: a diffusion tensor imaging study. *Sci Rep* 2014;4:6875.
152. Geuze E, Westenberg HG, Heinecke A, de Kloet CS, Goebel R, Vermetten E. Thinner prefrontal cortex in veterans with posttraumatic stress disorder. *Neuroimage* 2008;41(3):675–681.
153. Kasai K, Yamasue H, Gilbertson MW, Shenton ME, Rauch SL, Pitman RK. Evidence for acquired pregenual anterior cingulate gray matter loss from a twin study of combat-related posttraumatic stress disorder. *Biol Psychiatry* 2008;63(6):550–556.
154. Woodward SH, Kaloupek DG, Streeter CC, Martinez C, Schaer M, Eliez S. Decreased anterior cingulate volume in combat-related PTSD. *Biol Psychiatry* 2006;59(7):582–587.
155. Corbo V, Clément MH, Armony JL, Pruessner JC, Brunet A. Size versus shape differences: contrasting voxel-based and volumetric analyses of the anterior cingulate cortex in individuals with acute posttraumatic stress disorder. *Biol Psychiatry* 2005;58(2):119–124.
156. Suo X, Lei D, Li K, et al. Disrupted brain network topology in pediatric posttraumatic stress disorder: A resting-state fMRI study. *Hum Brain Mapp* 2015;36(9):3677–3686.
157. Hadjikhani N, Joseph RM, Snyder J, Tager-Flusberg H. Abnormal activation of the social brain during face perception in autism. *Hum Brain Mapp* 2007;28(5):441–449.
158. Murdaugh DL, Maximo JO, Kana RK. Changes in intrinsic connectivity of the brain's reading network following intervention in children with autism. *Hum Brain Mapp* 2015;36(8):2965–2979.

159. Lai G, Schneider HD, Schwarzenberger JC, Hirsch J. Speech stimulation during functional MR imaging as a potential indicator of autism. *Radiology* 2011;260(2):521–530.
160. Lombardo MV, Chakrabarti B, Bullmore ET, et al. Atypical neural self-representation in autism. *Brain* 2010;133(Pt 2):611–624.
1611. Luna B, Minshew NJ, Garver KE, et al. Neocortical system abnormalities in autism: an fMRI study of spatial working memory. *Neurology* 2002;59(6):834–840.
162. Verly M, Verhoeven J, Zink I, et al. Structural and functional underconnectivity as a negative predictor for language in autism. *Hum Brain Mapp* 2014;35(8):3602–3615.
